# Supplementary material for: Field studies reveal a close relative of C. elegans thrives in the fresh figs of Ficus septica and disperses on its Ceratosolen pollinating wasps
Source: BMC Ecol. 2018 Aug 21;18:26. doi: 10.1186/s12898-018-0182-z (PMC6102938; doi:10.1186/s12898-018-0182-z)
Supplement: Supplementary file 2 — Additional file 2. Top BLAST hits for Ficus septica fig-derived COI sequences. [file 12898_2018_182_MOESM2_ESM.xlsx]

## Sheet: all_coi_barcode_seq_to_nt_db_jo
dna source	sseqid	sseqid_genus	sseqid_species	qseqid	qlen	slen	qstart	qend	sstart	send	evalue	pident	length	qseq	sseq
nematode	EU407799.1	Caenorhabditis	briggsae	E2	334	13818	39	334	8616	8321	5.52e-98	88.851	296	GAAATAGATCTACTACGTATATTTTTTGTNGNACACATAAAATTAATACCCCCTAAAATAGAACTTAAACCAGCAGCATGAAGACTAAAAATTGCTATATCTACACTTCTACCAGGATGCCCTAAAGTACTTAAAGGTGGATATACAGTTCAACTTGTACCACAACCTATATCAACAAAACAAGCATCTAAAATTAATAGCATAGCTGTAGGTAAAAGTCAAAATCTCAAATTATTTAAACGCGGAAACCTTATATCAGGAGCCCCCATTATAAGTGGCAACATTCAATTACCAAA	GAAATAGATCTACTACGTAAATTTTTAGTTGTACACATAAAATTAATACCACCTAAAATAGATCTTAAACCAGCAGCATGTAATCTAAAAATAGCTAAATCAACACTCCTACCAGGATGACCTATAGTACTTAAAGGTGGATAAACAGTTCAACTAGTACCACAACCTATATCAACAAAACAAGCATCTAAAATCAATAACATAGAAGTAGGTAATAACCAAAAACTCAAATTATTCAAACGTGGAAATCTTATATCAGGAGCACCCAATATTAATGGTAACATTCAATTACCAAA
nematode	EU407799.1	Caenorhabditis	briggsae	D3	335	13818	1	335	8655	8321	2.54e-106	87.761	335	ACAAAGACAGTTCAAACAAAAAGTCTTATATGCTCAAGTGAAATAGATCTACTACGTAAATTTTTTGTTGTACACATAAAATTAATACCCCCTAAAATAGAACTTAAACCAGCAGCATGAAGACTAAAAATTGCTAAATCTACACTTCTACCAGGATGCCCTAAAGTACTTAAAGGTGGATATACAGTTCAACTTGTACCACAACCTATATCAACAAAACAAGCATCTAAAATTAATAGCATAGCTGTAGGTAAAAGTCAAAATCTCAAATTATTNAAACTCGTAAACCTTATATCAGGAGCCCCCAATATAAGNGGCAACATTCAATTACCAAA	ACAAATACAGTTCAGACAAATAAACTCATATGTTCCAAAGAAATAGATCTACTACGTAAATTTTTAGTTGTACACATAAAATTAATACCACCTAAAATAGATCTTAAACCAGCAGCATGTAATCTAAAAATAGCTAAATCAACACTCCTACCAGGATGACCTATAGTACTTAAAGGTGGATAAACAGTTCAACTAGTACCACAACCTATATCAACAAAACAAGCATCTAAAATCAATAACATAGAAGTAGGTAATAACCAAAAACTCAAATTATTCAAACGTGGAAATCTTATATCAGGAGCACCCAATATTAATGGTAACATTCAATTACCAAA
nematode	EU407802.1	Caenorhabditis	briggsae	F3	335	13914	1	335	8650	8316	1.52e-108	88.358	335	ACAAAGACAGTTCAAACAAAAAGTCTTATATGCTCAAGTGAAATAAATCTACTACGTAAATTTTTTGTTGTACACATAAAATTAATACCCCCTAAAATAGAACTTAAACCAGCAGCATGAAGACTAAAAATTGCTAAATCTACACTTCTACCAGGATGCCCTAAAGTACTTAAAGGTGGATATACAGTTCAACTTGTACCACAACCTATATCAACAAAACAAGCATCTAAAATTAATAGCATAGCTGTAGGTAAAAGTCAAAATCTCAAATTATTTAAACGCGGAAACCTTATATCAGGAGCCCCCAATATAAGTGGCAACATTCAATTACCAAA	ACAAATACAGTTCAAACAAATAAACTCATATGTTCCAAAGAAATAGATCTACTACGTAAATTTTTAGTTGTACACATAAAATTAATACCACCTAAAATAGATCTTAAACCAGCAGCATGTAATCTAAAAATAGCTAAATCAACACTCCTACCAGGGTGACCTATAGTACTTAAAGGTGGATAAACAGTTCAACTAGTACCACAACCTATATCAACAAAACAAGCATCTAAAATTAATAACATAGAAGTAGGTAATAACCAAAAACTTAAATTATTTAAACGTGGAAATCTTATATCAGGAGCACCTAATATTAATGGTAACATTCAATTACCAAA
nematode	EU407802.1	Caenorhabditis	briggsae	A1	335	13914	1	335	8650	8316	3.26e-110	88.657	335	ACAAAGACAGTTCAAACAAAAAGTCTTATATGCTCAAGTGAAATAGATCTACTACGTAAATTTTTTGTTGTACACATAAAATTAATACCCCCTAAAATAGAACTTAAACCAGCAGCATGAAGACTAAAAATTGCTAAATCTACACTTCTACCAGGATGCCCTAAAGTACTTAAAGGTGGATATACAGTTCAACTTGTACCACAACCTATATCAACAAAACAAGCATCTAAAATTAATAGCATAGCTGTAGGTAAAAGTCAAAATCTCAAATTATTTAAACGCGGAAACCTTATATCAGGAGCCCCCAATATAAGTGGCAACATTCAATTACCAAA	ACAAATACAGTTCAAACAAATAAACTCATATGTTCCAAAGAAATAGATCTACTACGTAAATTTTTAGTTGTACACATAAAATTAATACCACCTAAAATAGATCTTAAACCAGCAGCATGTAATCTAAAAATAGCTAAATCAACACTCCTACCAGGGTGACCTATAGTACTTAAAGGTGGATAAACAGTTCAACTAGTACCACAACCTATATCAACAAAACAAGCATCTAAAATTAATAACATAGAAGTAGGTAATAACCAAAAACTTAAATTATTTAAACGTGGAAATCTTATATCAGGAGCACCTAATATTAATGGTAACATTCAATTACCAAA
nematode	EU407802.1	Caenorhabditis	briggsae	B2	335	13914	1	335	8650	8316	3.26e-110	88.657	335	ACAAAGACAGTTCAAACAAAAAGTCTTATATGCTCAAGTGAAATAGATCTACTACGTAAATTTTTTGTTGTACACATAAAATTAATACCCCCTAAAATAGAACTTAAACCAGCAGCATGAAGACTAAAAATTGCTAAATCTACACTTCTACCAGGATGCCCTAAAGTACTTAAAGGTGGATATACAGTTCAACTTGTACCACAACCTATATCAACAAAACAAGCATCTAAAATTAATAGCATAGCTGTAGGTAAAAGTCAAAATCTCAAATTATTTAAACGCGGAAACCTTATATCAGGAGCCCCCAATATAAGTGGCAACATTCAATTACCAAA	ACAAATACAGTTCAAACAAATAAACTCATATGTTCCAAAGAAATAGATCTACTACGTAAATTTTTAGTTGTACACATAAAATTAATACCACCTAAAATAGATCTTAAACCAGCAGCATGTAATCTAAAAATAGCTAAATCAACACTCCTACCAGGGTGACCTATAGTACTTAAAGGTGGATAAACAGTTCAACTAGTACCACAACCTATATCAACAAAACAAGCATCTAAAATTAATAACATAGAAGTAGGTAATAACCAAAAACTTAAATTATTTAAACGTGGAAATCTTATATCAGGAGCACCTAATATTAATGGTAACATTCAATTACCAAA
nematode	EU407802.1	Caenorhabditis	briggsae	C1	335	13914	1	335	8650	8316	3.26e-110	88.657	335	ACAAAGACAGTTCAAACAAAAAGTCTTATATGCTCAAGTGAAATAGATCTACTACGTAAATTTTTTGTTGTACACATAAAATTAATACCCCCTAAAATAGAACTTAAACCAGCAGCATGAAGACTAAAAATTGCTAAATCTACACTTCTACCAGGATGCCCTAAAGTACTTAAAGGTGGATATACAGTTCAACTTGTACCACAACCTATATCAACAAAACAAGCATCTAAAATTAATAGCATAGCTGTAGGTAAAAGTCAAAATCTCAAATTATTTAAACGCGGAAACCTTATATCAGGAGCCCCCAATATAAGTGGCAACATTCAATTACCAAA	ACAAATACAGTTCAAACAAATAAACTCATATGTTCCAAAGAAATAGATCTACTACGTAAATTTTTAGTTGTACACATAAAATTAATACCACCTAAAATAGATCTTAAACCAGCAGCATGTAATCTAAAAATAGCTAAATCAACACTCCTACCAGGGTGACCTATAGTACTTAAAGGTGGATAAACAGTTCAACTAGTACCACAACCTATATCAACAAAACAAGCATCTAAAATTAATAACATAGAAGTAGGTAATAACCAAAAACTTAAATTATTTAAACGTGGAAATCTTATATCAGGAGCACCTAATATTAATGGTAACATTCAATTACCAAA
nematode	EU407802.1	Caenorhabditis	briggsae	C3	335	13914	1	335	8650	8316	3.26e-110	88.657	335	ACAAAGACAGTTCAAACAAAAAGTCTTATATGCTCAAGTGAAATAGATCTACTACGTAAATTTTTTGTTGTACACATAAAATTAATACCCCCTAAAATAGAACTTAAACCAGCAGCATGAAGACTAAAAATTGCTAAATCTACACTTCTACCAGGATGCCCTAAAGTACTTAAAGGTGGATATACAGTTCAACTTGTACCACAACCTATATCAACAAAACAAGCATCTAAAATTAATAGCATAGCTGTAGGTAAAAGTCAAAATCTCAAATTATTTAAACGCGGAAACCTTATATCAGGAGCCCCCAATATAAGTGGCAACATTCAATTACCAAA	ACAAATACAGTTCAAACAAATAAACTCATATGTTCCAAAGAAATAGATCTACTACGTAAATTTTTAGTTGTACACATAAAATTAATACCACCTAAAATAGATCTTAAACCAGCAGCATGTAATCTAAAAATAGCTAAATCAACACTCCTACCAGGGTGACCTATAGTACTTAAAGGTGGATAAACAGTTCAACTAGTACCACAACCTATATCAACAAAACAAGCATCTAAAATTAATAACATAGAAGTAGGTAATAACCAAAAACTTAAATTATTTAAACGTGGAAATCTTATATCAGGAGCACCTAATATTAATGGTAACATTCAATTACCAAA
nematode	EU407802.1	Caenorhabditis	briggsae	disp_2	335	13914	1	335	8650	8316	3.26e-110	88.657	335	ACAAAGACAGTTCAAACAAAAAGTCTTATATGCTCAAGTGAAATAGATCTACTACGTAAATTTTTTGTTGTACACATAAAATTAATACCCCCTAAAATAGAACTTAAACCAGCAGCATGAAGACTAAAAATTGCTAAATCTACACTTCTACCAGGATGCCCTAAAGTACTTAAAGGTGGATATACAGTTCAACTTGTACCACAACCTATATCAACAAAACAAGCATCTAAAATTAATAGCATAGCTGTAGGTAAAAGTCAAAATCTCAAATTATTTAAACGCGGAAACCTTATATCAGGAGCCCCCAATATAAGTGGCAACATTCAATTACCAAA	ACAAATACAGTTCAAACAAATAAACTCATATGTTCCAAAGAAATAGATCTACTACGTAAATTTTTAGTTGTACACATAAAATTAATACCACCTAAAATAGATCTTAAACCAGCAGCATGTAATCTAAAAATAGCTAAATCAACACTCCTACCAGGGTGACCTATAGTACTTAAAGGTGGATAAACAGTTCAACTAGTACCACAACCTATATCAACAAAACAAGCATCTAAAATTAATAACATAGAAGTAGGTAATAACCAAAAACTTAAATTATTTAAACGTGGAAATCTTATATCAGGAGCACCTAATATTAATGGTAACATTCAATTACCAAA
nematode	EU407802.1	Caenorhabditis	briggsae	disp_6	335	13914	1	335	8650	8316	3.26e-110	88.657	335	ACAAAGACAGTTCAAACAAAAAGTCTTATATGCTCAAGTGAAATAGATCTACTACGTAAATTTTTTGTTGTACACATAAAATTAATACCCCCTAAAATAGAACTTAAACCAGCAGCATGAAGACTAAAAATTGCTAAATCTACACTTCTACCAGGATGCCCTAAAGTACTTAAAGGTGGATATACAGTTCAACTTGTACCACAACCTATATCAACAAAACAAGCATCTAAAATTAATAGCATAGCTGTAGGTAAAAGTCAAAATCTCAAATTATTTAAACGCGGAAACCTTATATCAGGAGCCCCCAATATAAGTGGCAACATTCAATTACCAAA	ACAAATACAGTTCAAACAAATAAACTCATATGTTCCAAAGAAATAGATCTACTACGTAAATTTTTAGTTGTACACATAAAATTAATACCACCTAAAATAGATCTTAAACCAGCAGCATGTAATCTAAAAATAGCTAAATCAACACTCCTACCAGGGTGACCTATAGTACTTAAAGGTGGATAAACAGTTCAACTAGTACCACAACCTATATCAACAAAACAAGCATCTAAAATTAATAACATAGAAGTAGGTAATAACCAAAAACTTAAATTATTTAAACGTGGAAATCTTATATCAGGAGCACCTAATATTAATGGTAACATTCAATTACCAAA
nematode	EU407802.1	Caenorhabditis	briggsae	E3	335	13914	1	335	8650	8316	3.26e-110	88.657	335	ACAAAGACAGTTCAAACAAAAAGTCTTATATGCTCAAGTGAAATAGATCTACTACGTAAATTTTTTGTTGTACACATAAAATTAATACCCCCTAAAATAGAACTTAAACCAGCAGCATGAAGACTAAAAATTGCTAAATCTACACTTCTACCAGGATGCCCTAAAGTACTTAAAGGTGGATATACAGTTCAACTTGTACCACAACCTATATCAACAAAACAAGCATCTAAAATTAATAGCATAGCTGTAGGTAAAAGTCAAAATCTCAAATTATTTAAACGCGGAAACCTTATATCAGGAGCCCCCAATATAAGTGGCAACATTCAATTACCAAA	ACAAATACAGTTCAAACAAATAAACTCATATGTTCCAAAGAAATAGATCTACTACGTAAATTTTTAGTTGTACACATAAAATTAATACCACCTAAAATAGATCTTAAACCAGCAGCATGTAATCTAAAAATAGCTAAATCAACACTCCTACCAGGGTGACCTATAGTACTTAAAGGTGGATAAACAGTTCAACTAGTACCACAACCTATATCAACAAAACAAGCATCTAAAATTAATAACATAGAAGTAGGTAATAACCAAAAACTTAAATTATTTAAACGTGGAAATCTTATATCAGGAGCACCTAATATTAATGGTAACATTCAATTACCAAA
nematode	EU407802.1	Caenorhabditis	briggsae	F1	335	13914	1	335	8650	8316	3.26e-110	88.657	335	ACAAAGACAGTTCAAACAAAAAGTCTTATATGCTCAAGTGAAATAGATCTACTACGTAAATTTTTTGTTGTACACATAAAATTAATACCCCCTAAAATAGAACTTAAACCAGCAGCATGAAGACTAAAAATTGCTAAATCTACACTTCTACCAGGATGCCCTAAAGTACTTAAAGGTGGATATACAGTTCAACTTGTACCACAACCTATATCAACAAAACAAGCATCTAAAATTAATAGCATAGCTGTAGGTAAAAGTCAAAATCTCAAATTATTTAAACGCGGAAACCTTATATCAGGAGCCCCCAATATAAGTGGCAACATTCAATTACCAAA	ACAAATACAGTTCAAACAAATAAACTCATATGTTCCAAAGAAATAGATCTACTACGTAAATTTTTAGTTGTACACATAAAATTAATACCACCTAAAATAGATCTTAAACCAGCAGCATGTAATCTAAAAATAGCTAAATCAACACTCCTACCAGGGTGACCTATAGTACTTAAAGGTGGATAAACAGTTCAACTAGTACCACAACCTATATCAACAAAACAAGCATCTAAAATTAATAACATAGAAGTAGGTAATAACCAAAAACTTAAATTATTTAAACGTGGAAATCTTATATCAGGAGCACCTAATATTAATGGTAACATTCAATTACCAAA
nematode	EU407802.1	Caenorhabditis	briggsae	H1	335	13914	1	335	8650	8316	3.26e-110	88.657	335	ACAAAGACAGTTCAAACAAAAAGTCTTATATGCTCAAGTGAAATAGATCTACTACGTAAATTTTTTGTTGTACACATAAAATTAATACCCCCTAAAATAGAACTTAAACCAGCAGCATGAAGACTAAAAATTGCTAAATCTACACTTCTACCAGGATGCCCTAAAGTACTTAAAGGTGGATATACAGTTCAACTTGTACCACAACCTATATCAACAAAACAAGCATCTAAAATTAATAGCATAGCTGTAGGTAAAAGTCAAAATCTCAAATTATTTAAACGCGGAAACCTTATATCAGGAGCCCCCAATATAAGTGGCAACATTCAATTACCAAA	ACAAATACAGTTCAAACAAATAAACTCATATGTTCCAAAGAAATAGATCTACTACGTAAATTTTTAGTTGTACACATAAAATTAATACCACCTAAAATAGATCTTAAACCAGCAGCATGTAATCTAAAAATAGCTAAATCAACACTCCTACCAGGGTGACCTATAGTACTTAAAGGTGGATAAACAGTTCAACTAGTACCACAACCTATATCAACAAAACAAGCATCTAAAATTAATAACATAGAAGTAGGTAATAACCAAAAACTTAAATTATTTAAACGTGGAAATCTTATATCAGGAGCACCTAATATTAATGGTAACATTCAATTACCAAA
nematode	EU407802.1	Caenorhabditis	briggsae	H2	335	13914	1	335	8650	8316	3.26e-110	88.657	335	ACAAAGACAGTTCAAACAAAAAGTCTTATATGCTCAAGTGAAATAGATCTACTACGTAAATTTTTTGTTGTACACATAAAATTAATACCCCCTAAAATAGAACTTAAACCAGCAGCATGAAGACTAAAAATTGCTAAATCTACACTTCTACCAGGATGCCCTAAAGTACTTAAAGGTGGATATACAGTTCAACTTGTACCACAACCTATATCAACAAAACAAGCATCTAAAATTAATAGCATAGCTGTAGGTAAAAGTCAAAATCTCAAATTATTTAAACGCGGAAACCTTATATCAGGAGCCCCCAATATAAGTGGCAACATTCAATTACCAAA	ACAAATACAGTTCAAACAAATAAACTCATATGTTCCAAAGAAATAGATCTACTACGTAAATTTTTAGTTGTACACATAAAATTAATACCACCTAAAATAGATCTTAAACCAGCAGCATGTAATCTAAAAATAGCTAAATCAACACTCCTACCAGGGTGACCTATAGTACTTAAAGGTGGATAAACAGTTCAACTAGTACCACAACCTATATCAACAAAACAAGCATCTAAAATTAATAACATAGAAGTAGGTAATAACCAAAAACTTAAATTATTTAAACGTGGAAATCTTATATCAGGAGCACCTAATATTAATGGTAACATTCAATTACCAAA
nematode	EU407802.1	Caenorhabditis	briggsae	H3	335	13914	1	335	8650	8316	3.26e-110	88.657	335	ACAAAGACAGTTCAAACAAAAAGTCTTATATGCTCAAGTGAAATAGATCTACTACGTAAATTTTTTGTTGTACACATAAAATTAATACCCCCTAAAATAGAACTTAAACCAGCAGCATGAAGACTAAAAATTGCTAAATCTACACTTCTACCAGGATGCCCTAAAGTACTTAAAGGTGGATATACAGTTCAACTTGTACCACAACCTATATCAACAAAACAAGCATCTAAAATTAATAGCATAGCTGTAGGTAAAAGTCAAAATCTCAAATTATTTAAACGCGGAAACCTTATATCAGGAGCCCCCAATATAAGTGGCAACATTCAATTACCAAA	ACAAATACAGTTCAAACAAATAAACTCATATGTTCCAAAGAAATAGATCTACTACGTAAATTTTTAGTTGTACACATAAAATTAATACCACCTAAAATAGATCTTAAACCAGCAGCATGTAATCTAAAAATAGCTAAATCAACACTCCTACCAGGGTGACCTATAGTACTTAAAGGTGGATAAACAGTTCAACTAGTACCACAACCTATATCAACAAAACAAGCATCTAAAATTAATAACATAGAAGTAGGTAATAACCAAAAACTTAAATTATTTAAACGTGGAAATCTTATATCAGGAGCACCTAATATTAATGGTAACATTCAATTACCAAA
nematode	EU407802.1	Caenorhabditis	briggsae	A2	335	13914	1	335	8650	8316	5.46e-108	88.06	335	ACAAAGACAGTTCAAACAAAAAGTCTTATATGCTCAAGTGAAATAGATCTANTACGTAAATTTTTTGTTGTACACNTAAAATTAATACCCCCTAAAATAGAACTTAAACCAGCAGCATGAAGACTAAAAATTGCTAAATCTACACTTCTACCAGGATGCCCTAAAGTACTTAAAGGTGGATATACAGTTCAACTTGTACCACAACCTATATCAACAAAACAAGCATCTAAAATTAATAGCATAGCTGTAGGTAAAAGTCAAAATCTCAAATTATTTAAACGCGGAAACCTTATATCAGGAGCCCCCAATATAAGTGGCAACATTCAATTACCAAA	ACAAATACAGTTCAAACAAATAAACTCATATGTTCCAAAGAAATAGATCTACTACGTAAATTTTTAGTTGTACACATAAAATTAATACCACCTAAAATAGATCTTAAACCAGCAGCATGTAATCTAAAAATAGCTAAATCAACACTCCTACCAGGGTGACCTATAGTACTTAAAGGTGGATAAACAGTTCAACTAGTACCACAACCTATATCAACAAAACAAGCATCTAAAATTAATAACATAGAAGTAGGTAATAACCAAAAACTTAAATTATTTAAACGTGGAAATCTTATATCAGGAGCACCTAATATTAATGGTAACATTCAATTACCAAA
nematode	EU407802.1	Caenorhabditis	briggsae	disp_3	335	13914	1	335	8650	8316	7.06e-107	87.761	335	ACAAAGACAGTTCAAACAAAAAGTNTTATATGCTCAAGTGAAATAGATNTANTACGTAAATTTTTTGTTGTACACATAAAATTAATACCCCCTAAAATAGAACTTAAACCAGCAGCATGAAGACTAAAAATTGCTAAATCTACACTTCTACCAGGATGCCCTAAAGTACTTAAAGGTGGATATACAGTTCAACTTGTACCACAACCTATATCAACAAAACAAGCATCTAAAATTAATAGCATAGCTGTAGGTAAAAGTCAAAATCTCAAATTATTTAAACGCGGAAACCTTATATCAGGAGCCCCCAATATAAGTGGCAACATTCAATTACCAAA	ACAAATACAGTTCAAACAAATAAACTCATATGTTCCAAAGAAATAGATCTACTACGTAAATTTTTAGTTGTACACATAAAATTAATACCACCTAAAATAGATCTTAAACCAGCAGCATGTAATCTAAAAATAGCTAAATCAACACTCCTACCAGGGTGACCTATAGTACTTAAAGGTGGATAAACAGTTCAACTAGTACCACAACCTATATCAACAAAACAAGCATCTAAAATTAATAACATAGAAGTAGGTAATAACCAAAAACTTAAATTATTTAAACGTGGAAATCTTATATCAGGAGCACCTAATATTAATGGTAACATTCAATTACCAAA
parasitic wasp	JQ408682.1	Philotrypesis	quadrisetosa	7_para	332	554	1	332	409	78	6.79e-127	91.867	332	AATATTATTGCTCACCCAAATAAAGGTAAATTTTCAATTTTATAAATTTTTATATTTATTATAGTAGTAATAAAATTAATTGAACCTATAATAGAAGATAATCCTGCAATATGAAGAGAAAAAATAGATAGATCTACTGAAGGTCCTCTATGTCCTAAATTTGAAGAAAGAGGAGGATAAACTGTTCACCCTGTCCCTGTCCCTGTTCCAATAAATATTCTAGAAATTAATAATATAATTCTAGGTGGTAATAATCAAAATCTTATATTATTTATTCGAGGAAATGCTATATCTGGAGCTCCTAATATAATTGGAATTAAATAATTTCCAAA	AATATTATAGCTCATCCAAATAAAGATAAATTTTCAATTTTATAAATTTTTATATTTATTATTGTTCTAATAAAATTAATTGAACCTATAATAGAAGATAATCCAGCAATATGTAAAGAAAAAATTGATAAATCTACTGAAGGACCATTATGACCTAAATTTGAAGATAAAGGAGGATAAACTGTTCATCCTGTTCCTGTTCCAGTTCCAATAAATATTCTAGAAATTAATAACATAATTCTTGGGGGTAATAATCAAAATCTTATATTATTTATTCGAGGAAAAGCTATATCTGGTGCTCCTAATATAATAGGAATTAAATAATTTCCAAA
parasitic wasp	JQ408682.1	Philotrypesis	quadrisetosa	9_para	332	554	1	332	409	78	6.79e-127	91.867	332	AATATTATTGCTCACCCAAATAAAGGTAAATTTTCAATTTTATAAATTTTTATATTTATTATAGTAGTAATAAAATTAATTGAACCTATAATAGAAGATAATCCTGCAATATGAAGAGAAAAAATAGATAGATCTACTGAAGGTCCTCTATGTCCTAAATTTGAAGAAAGAGGAGGATAAACTGTTCACCCTGTCCCTGTCCCTGTTCCAATAAATATTCTAGAAATTAATAATATAATTCTAGGTGGTAATAATCAAAATCTTATATTATTTATTCGAGGAAATGCTATATCTGGAGCTCCTAATATAATTGGAATTAAATAATTTCCAAA	AATATTATAGCTCATCCAAATAAAGATAAATTTTCAATTTTATAAATTTTTATATTTATTATTGTTCTAATAAAATTAATTGAACCTATAATAGAAGATAATCCAGCAATATGTAAAGAAAAAATTGATAAATCTACTGAAGGACCATTATGACCTAAATTTGAAGATAAAGGAGGATAAACTGTTCATCCTGTTCCTGTTCCAGTTCCAATAAATATTCTAGAAATTAATAACATAATTCTTGGGGGTAATAATCAAAATCTTATATTATTTATTCGAGGAAAAGCTATATCTGGTGCTCCTAATATAATAGGAATTAAATAATTTCCAAA
nematode	JX163961.1	Acrostichus	sp.	G3	335	683	1	335	341	7	2.5e-116	89.552	335	ACAAAAACAGTTCAAACAAATAATCTTATATGTTCTAAAGAGATAGACCTCCTTCGTAAATTCTTAGTTGTACATATAAAATTAATACCACCTAAAATAGAACTTAAACCANCACAATGTAACCTAAAAATTGCTAAATCAACCCTTCTCCCCGGGTGACCTAATGTACTTAAAGGAGGGTAAACAGTTCAACTAGTACCAGCACCTATATCCACAAAACTAGAATCTAAAATTAAAAATAAAGCAGTTGGTAATAATCAAAAACTTAAATTATTTAAACGGGGAAAACTCATATCTGGTGCACCTAATATTAATGGNAATATTCAATTTCCAAA	ACAAATACAGTTCAAACAAATAAAGTTATGTGTTCTAAAGAAATAGAACTACTACGTAAATTTTTTGTTGTACACATAAAATTAATACCACCTAAAATAGAACTTAAACCAGCACAATGTAAACTAAAAATAGCTAAATCTACTCTTCTACCCGGGTGACCTATAGTTCTTAAAGGTGGATAAACAGTTCAACTAGTACCACAACCTATATCTACAAATCTAGAATCTAAAATTAAAAATATAGAAGTTGGTAATAATCAAAAACTTAAATTATTTAAACGTGGAAATCTTATGTCTGGGGCACCTAATATTAATGGTAATATTCAATTACCAAA
nematode	JX163961.1	Acrostichus	sp.	E1	335	683	1	335	341	7	9e-116	89.552	335	ACAAAAACCGTTCAAACAAATAATCTTATATGTTCTAAAGAGATAGACCTCCTTCGTAAATTCTTAGTTGTACATATAAAATTAATACCACCTAAAATAGAACTTAAACCAGCACAATGTAACCTAAAAATTGCTAAATCAACCCTTCTCCCCGGGTGACCTAATGTACNTAAAGGAGGGTAAACAGTTCAACTAGTACCAGCACCTATATCCACAAAACTAGAATCTAAAATTAAAAATAAAGCAGTTGGTAATAATCAAAAACTTAAATTATTTAAACGGGGAAAACTCATATCTGGTGCACCTAATATTAATGGTAATATTCAATTTCCAAA	ACAAATACAGTTCAAACAAATAAAGTTATGTGTTCTAAAGAAATAGAACTACTACGTAAATTTTTTGTTGTACACATAAAATTAATACCACCTAAAATAGAACTTAAACCAGCACAATGTAAACTAAAAATAGCTAAATCTACTCTTCTACCCGGGTGACCTATAGTTCTTAAAGGTGGATAAACAGTTCAACTAGTACCACAACCTATATCTACAAATCTAGAATCTAAAATTAAAAATATAGAAGTTGGTAATAATCAAAAACTTAAATTATTTAAACGTGGAAATCTTATGTCTGGGGCACCTAATATTAATGGTAATATTCAATTACCAAA
nematode	KY552910.1	Caenorhabditis	castelli	B3	335	13655	1	335	8434	8100	3.26e-110	88.657	335	ACAAACACAGTTCAAACAAAAAGTCTTATATGCTCAAGTGAAATAGATCTACTACGTAAATTTTTTGTTGTACACATAAAATTAATACCCCCTAAAATAGAACTTAAACCAGCAGCATGAAGACTAAAAATTGCTAAATCTACACTTCTACCAGGATGCCCTAAAGTACTTAAAGGTGGATATACAGTTCAACTTGTACCACAACCTATATCAACAAAACAAGCATCTAAAATTAATAGCATAGCTGTAGGTAAAAGTCAAAATCTCAAATTATTTAAACGCGGAAACCTTATATCAGGAGCCCCCAATATAAGTGGCAACATTCAATTACCAAA	ACAAACACAGTTCAAACAAATAATCTTATATGTTCTAACGAAATAGACCTACTACGTAAATTTTTTGTTGTACACATAAAATTAATTCCACCTAAAATAGACCTTAAACCGGAAGCATGTAAACTAAAGATAGCTAAATCTACACTTCTACCAGGATGACCTAAAGTTCTTAGAGGTGGATAAACTGTTCATCTTGTACCACAACCTATGTCTACAAAACAAGCATCTAAAATTAATAATATAGAAGTAGGTAAAAGTCAAAAACTTAAATTATTTAAACGTGGAAATCTTATATCTGGTGCACCTAATATAAGTGGTAACATTCAATTTCCAAA
pollinating wasp	LC208762.1	Martininema	baculum	1_poll	335	660	1	326	326	1	3.35e-90	85.583	326	ACAAAAATTGTTCAAACAAACAAACATATATTCTCTAATGAAATAGATCTACTTCGCAAATTTTTAGTAGTCACTATAAAATTAATACCACCTAAAATTGAACTTACTCCTGCACAATGCAAACTAAAAATAGCAATATCTACACTACTATCTAAATGACCACGTGTCCTTAAAGGAGGATAAAAAACCCAGCTAGTCCCACAACCTCCATCTAAAATACCAGATAATAGCAATAAAATAAAAGAAACAGGAAGTAACCAAAATCTTAAATTATTTAAACGAGGAAAACTTATATCAGGAGCACCAATCATTAAAGGCAAAAGCCA	ACAAAAATTGTTCAAACAAATAAACACATATTTTCTAAAGAAATAGAACCCCTACGCAAATTTTTTGTAGTAACTATAAAATTGATACCACCTAAAATAGATCTGACTCCAGCACAATGTAAACTAAAAATAGCAATGTCTACACTACTACCAGGATGACCCTTTGTTCTCAGTGGAGGATAAAATACCCAACTAGTACCACAACCTAATTCTAACACACCAGATAAAAGTAAAAGTATAAAAGAAACAGGAAGTAACCAAAAACTCAAATTATTTAAACGAGGAAAACTTATATCAGGAGCACCAATTATTAAAGGTAATAGTCA
pollinating wasp	LC208762.1	Martininema	baculum	3_poll	335	660	1	326	326	1	3.35e-90	85.583	326	ACAAAAATTGTTCAAACAAACAAACATATATTCTCTAATGAAATAGATCTACTTCGCAAATTTTTAGTAGTCACTATAAAATTAATACCACCTAAAATTGAACTTACTCCTGCACAATGCAAACTAAAAATAGCAATATCTACACTACTATCTAAATGACCACGTGTCCTTAAAGGAGGATAAAAAACCCAGCTAGTCCCACAACCTCCATCTAAAATACCAGATAATAGCAATAAAATAAAAGAAACAGGAAGTAACCAAAATCTTAAATTATTTAAACGAGGAAAACTTATATCAGGAGCACCAATCATTAAAGGCAAAAGCCA	ACAAAAATTGTTCAAACAAATAAACACATATTTTCTAAAGAAATAGAACCCCTACGCAAATTTTTTGTAGTAACTATAAAATTGATACCACCTAAAATAGATCTGACTCCAGCACAATGTAAACTAAAAATAGCAATGTCTACACTACTACCAGGATGACCCTTTGTTCTCAGTGGAGGATAAAATACCCAACTAGTACCACAACCTAATTCTAACACACCAGATAAAAGTAAAAGTATAAAAGAAACAGGAAGTAACCAAAAACTCAAATTATTTAAACGAGGAAAACTTATATCAGGAGCACCAATTATTAAAGGTAATAGTCA
pollinating wasp	LC208762.1	Martininema	baculum	5_poll	335	660	1	326	326	1	3.35e-90	85.583	326	ACAAAAATTGTTCAAACAAACAAACATATATTCTCTAATGAAATAGATCTACTTCGCAAATTTTTAGTAGTCACTATAAAATTAATACCACCTAAAATTGAACTTACTCCTGCACAATGCAAACTAAAAATAGCAATATCTACACTACTATCTAAATGACCACGTGTCCTTAAAGGAGGATAAAAAACCCAGCTAGTCCCACAACCTCCATCTAAAATACCAGATAATAGCAATAAAATAAAAGAAACAGGAAGTAACCAAAATCTTAAATTATTTAAACGAGGAAAACTTATATCAGGAGCACCAATCATTAAAGGCAAAAGCCA	ACAAAAATTGTTCAAACAAATAAACACATATTTTCTAAAGAAATAGAACCCCTACGCAAATTTTTTGTAGTAACTATAAAATTGATACCACCTAAAATAGATCTGACTCCAGCACAATGTAAACTAAAAATAGCAATGTCTACACTACTACCAGGATGACCCTTTGTTCTCAGTGGAGGATAAAATACCCAACTAGTACCACAACCTAATTCTAACACACCAGATAAAAGTAAAAGTATAAAAGAAACAGGAAGTAACCAAAAACTCAAATTATTTAAACGAGGAAAACTTATATCAGGAGCACCAATTATTAAAGGTAATAGTCA
nematode	MF167646.1	Phasmarhabditis	sp.	D1	335	656	1	335	340	6	3.24e-115	89.552	335	ACAAAAACAGTTCAAACAAATAATCTTATATGTTCTAAAGAGATAGACCTCCTTCGTAAATTCTTAGTTGTACATATAAAATTAATACCACCTAAAATAGAACTTAAACCAGCACAATGTAACCTAAAAATTGCTAAATCAACCCTTCTCCCTGGGTGACCTAATGTACTTAAAGGAGGGTAAACAGTTCAACTAGTACCAGCACCTATATCCACAAAACTAGAATCTAAAATTAAAAATAAAGCAGTTGGTAATAATCAAAAACTTAAATTATTTAAACGGGGAAAACTCATATCTGGTGCACCTAATATTAATGGTAGTATTCAATTTCCAAA	ACAAATACAGTTCAAACAAATAATCTTATATGTTCTAAAGAAATAGAACTTCTACGTAAATTTTTTGTTGTACACATAAAATTAATACCACCTAAAATAGAACTTAAACCTGCACAATGTAAACTAAAAATAGCCAAATCCACCCTTCTACCAGGATGACCTAATGTTCTTAAAGGAGGATAAACTGTTCATCTAGTACCACAACCTATATCAACAAAACTAGAATCTAAAATTAAAAACATTGCCGTAGGTAATAATCAAAAACTTAAATTATTTAAACGAGGAAAACTTATATCGGGTGCACCTAATATTAAAGGTAATAATCAATTACCAAA
nematode	MF167646.1	Phasmarhabditis	sp.	disp_1	335	656	1	335	340	6	3.24e-115	89.552	335	ACAAAAACAGTTCAAACAAATAATCTTATATGTTCTAAAGAGATAGACCTCCTTCGTAAATTCTTAGTTGTACATATAAAATTAATACCACCTAAAATAGAACTTAAACCAGCACAATGTAACCTAAAAATTGCTAAATCAACCCTTCTCCCTGGGTGACCTAATGTACTTAAAGGAGGGTAAACAGTTCAACTAGTACCAGCACCTATATCCACAAAACTAGAATCTAAAATTAAAAATAAAGCAGTTGGTAATAATCAAAAACTTAAATTATTTAAACGGGGAAAACTCATATCTGGTGCACCTAATATTAATGGTAGTATTCAATTTCCAAA	ACAAATACAGTTCAAACAAATAATCTTATATGTTCTAAAGAAATAGAACTTCTACGTAAATTTTTTGTTGTACACATAAAATTAATACCACCTAAAATAGAACTTAAACCTGCACAATGTAAACTAAAAATAGCCAAATCCACCCTTCTACCAGGATGACCTAATGTTCTTAAAGGAGGATAAACTGTTCATCTAGTACCACAACCTATATCAACAAAACTAGAATCTAAAATTAAAAACATTGCCGTAGGTAATAATCAAAAACTTAAATTATTTAAACGAGGAAAACTTATATCGGGTGCACCTAATATTAAAGGTAATAATCAATTACCAAA
nematode	MF167646.1	Phasmarhabditis	sp.	B1	335	656	3	335	339	6	4.19e-114	89.521	334	CAAA-ACAGTTCAAACAAATAATCTTATATGTTCTAAAGAGATAGACCTCCTTCGTAAATTCTTAGTTGTACATATAAAATTAATACCACCTAAAATAGAACTTAAACCAGCACAATGTAACCTAAAAATTGCTAAATCAACCCTTCTCCCTGGGTGACCTAATGTACTTAAAGGAGGGTAAACAGTTCAACTAGTACCAGCACCTATATCCACAAAACTAGAATCTAAAATTAAAAATAAAGCAGTTGGTAATAATCAAAAACTTAAATTATTTAAACGGGGAAAACTCATATCTGGTGCACCTAATATTAATGGTAGTATTCAATTTCCAAA	CAAATACAGTTCAAACAAATAATCTTATATGTTCTAAAGAAATAGAACTTCTACGTAAATTTTTTGTTGTACACATAAAATTAATACCACCTAAAATAGAACTTAAACCTGCACAATGTAAACTAAAAATAGCCAAATCCACCCTTCTACCAGGATGACCTAATGTTCTTAAAGGAGGATAAACTGTTCATCTAGTACCACAACCTATATCAACAAAACTAGAATCTAAAATTAAAAACATTGCCGTAGGTAATAATCAAAAACTTAAATTATTTAAACGAGGAAAACTTATATCGGGTGCACCTAATATTAAAGGTAATAATCAATTACCAAA
